# Supplementary material
Source: MDPI journal article supplement (https://www.mdpi.com/2073-4433/12/5/624)
Supplement: s1 [file s1 › atmosphere-1165799-supplementary.pdf]

# Which reanalysis dataset should we use for renewable energy analysis in Ireland?

Eadaoin Doddy Clarke, Seánie Griffin, Frank McDermott,  
João Monteiro Correia and Conor Sweeney

## S1 Spatial Distribution

Figures S1, S2 and S3 shows the mean temperature, wind speed and shortwave radiation (SW) aggregated from the data used in this study (1982-2007) for each reanalysis and for the observation stations.

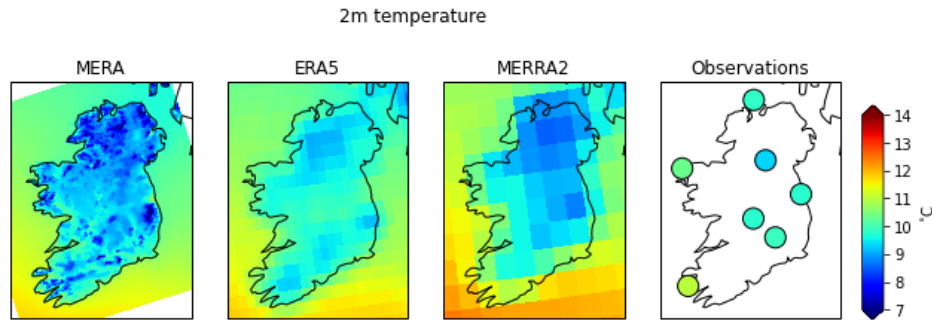

Figure S1: The spatial distribution of 2m temperature for each reanalysis and the weather observation stations.

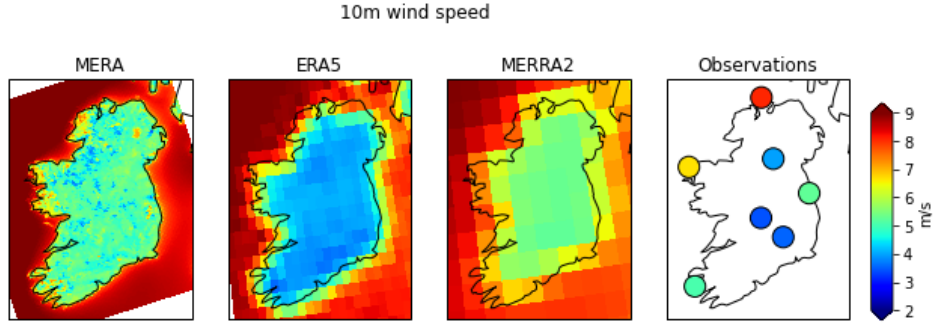

Figure S2: The spatial distribution of 10m wind speed for each reanalysis and the weather observation stations.

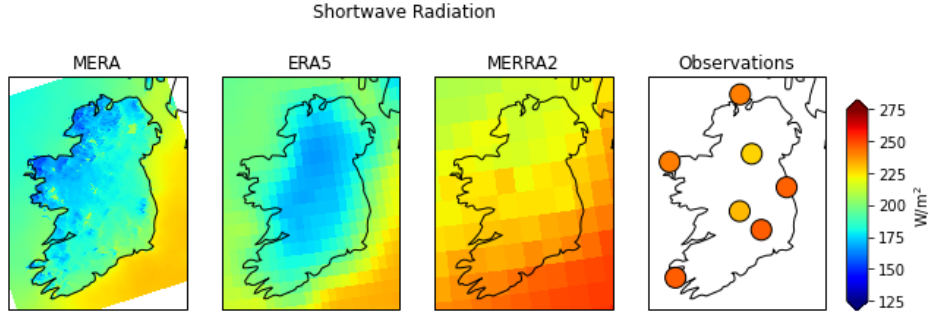

Figure S3: The spatial distribution of summer (JJA) shortwave radiation for each reanalysis and the weather observation stations.

## S2 Diurnal variability

### S2.1 Temperature

Figures S4 to S9 show the diurnal 2m temperature mean error at all stations, similar to Figure 3 in the main text.

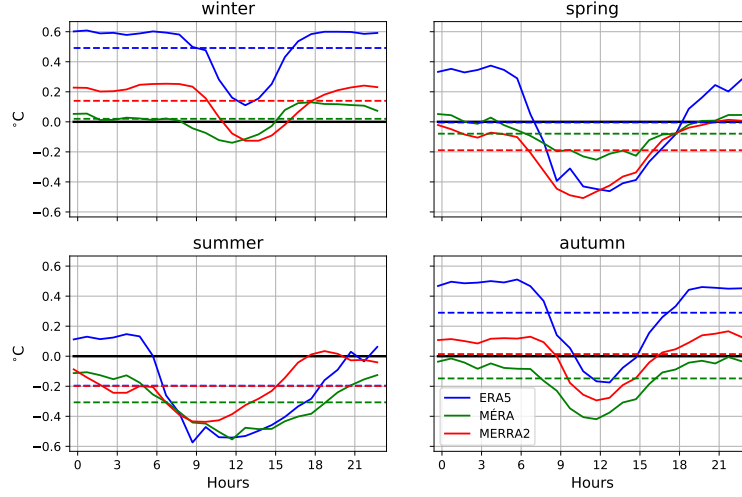

Figure S4: Diurnal mean error (ME) for 2m temperature at the Malin Head in winter (DJF), spring (MAM), summer (JJA) and autumn (SON) for ERA5 (blue), MERA (green) and MERRA-2 (red). The horizontal dashed lines represent the overall average seasonal ME.

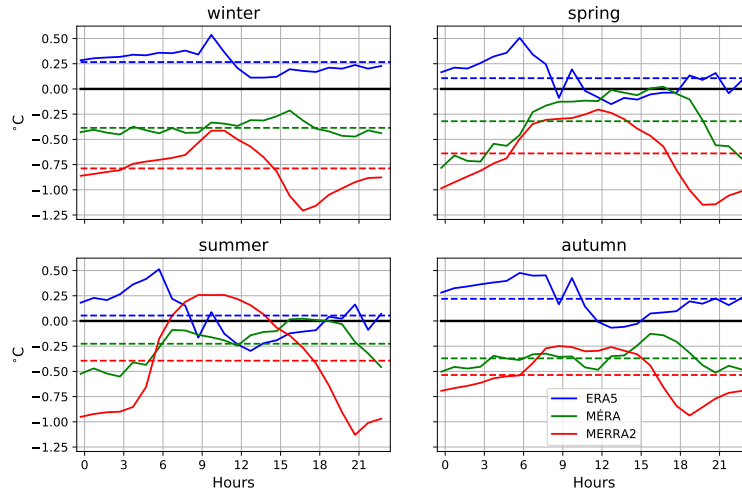

Figure S5: Diurnal mean error (ME) for 2m temperature at the Clones in winter (DJF), spring (MAM), summer (JJA) and autumn (SON) for ERA5 (blue), MERA (green) and MERRA-2 (red). The horizontal dashed lines represent the overall average seasonal ME.

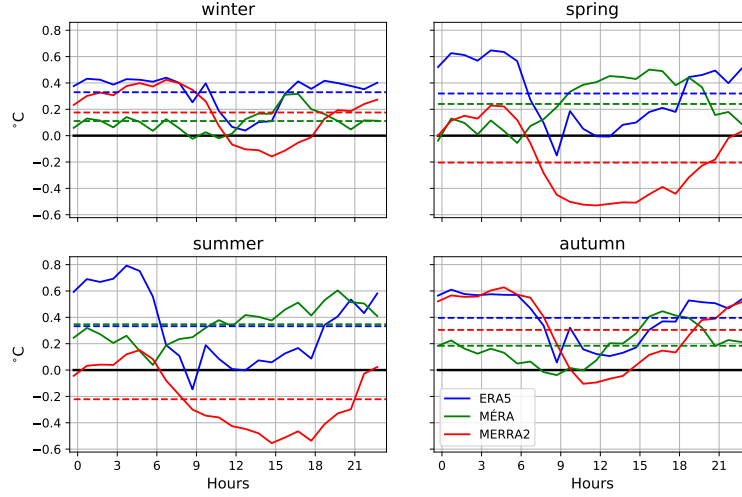

Figure S6: Diurnal mean error (ME) for 2m temperature at the Dublin Airport in winter (DJF), spring (MAM), summer (JJA) and autumn (SON) for ERA5 (blue), MERA (green) and MERRA-2 (red). The horizontal dashed lines represent the overall average seasonal ME.

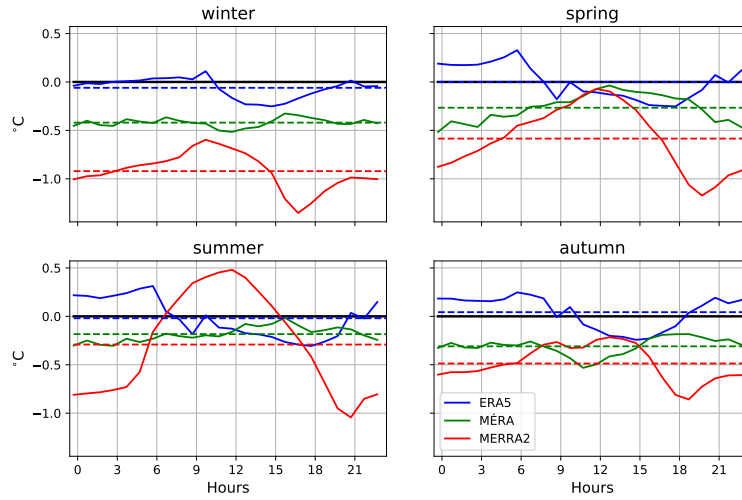

Figure S7: Diurnal mean error (ME) for 2m temperature at the Birr in winter (DJF), spring (MAM), summer (JJA) and autumn (SON) for ERA5 (blue), MERA (green) and MERRA-2 (red). The horizontal dashed lines represent the overall average seasonal ME.

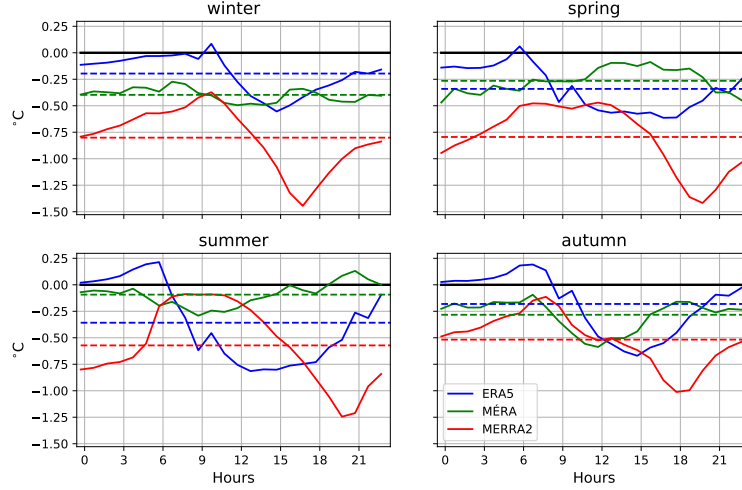

Figure S8: Diurnal mean error (ME) for 2m temperature at the Kilkenny in winter (DJF), spring (MAM), summer (JJA) and autumn (SON) for ERA5 (blue), MERA (green) and MERRA-2 (red). The horizontal dashed lines represent the overall average seasonal ME.

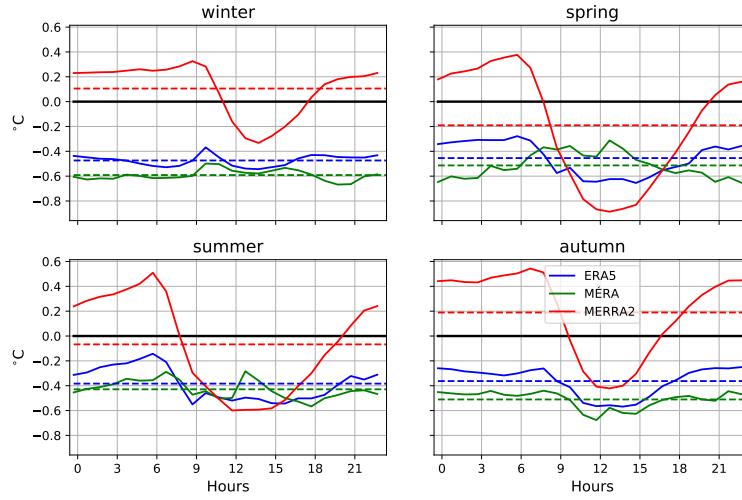

Figure S9: Diurnal mean error (ME) for 2m temperature at the Valentia Observatory in winter (DJF), spring (MAM), summer (JJA) and autumn (SON) for ERA5 (blue), MERA (green) and MERRA-2 (red). The horizontal dashed lines represent the overall average seasonal ME.

## S2.2 Wind Speed

Figures S10 to S15 show the diurnal mean 10m wind speed at all stations, similar to Figure 5 in the main text.

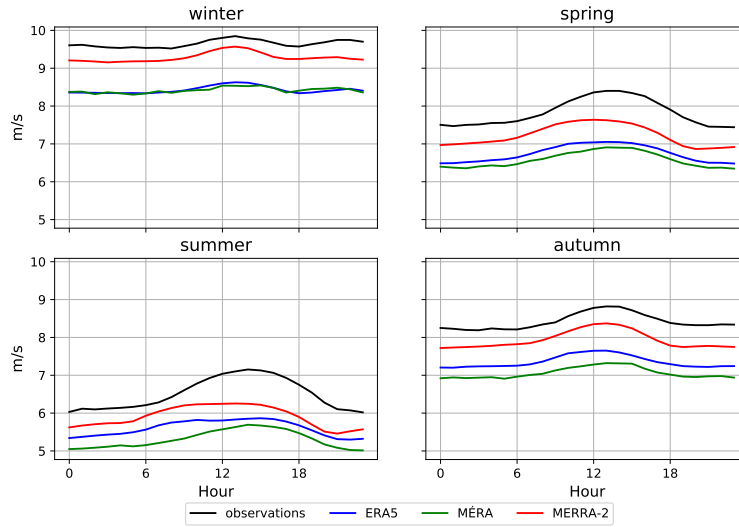

Figure S10: Diurnal mean 10m wind speed at the Malin Head in winter (DJF), spring (MAM), summer (JJA) and autumn (SON) for ERA5 (blue), MÉRA (green) and MERRA-2 (red). The horizontal dashed lines represent the overall average seasonal ME.

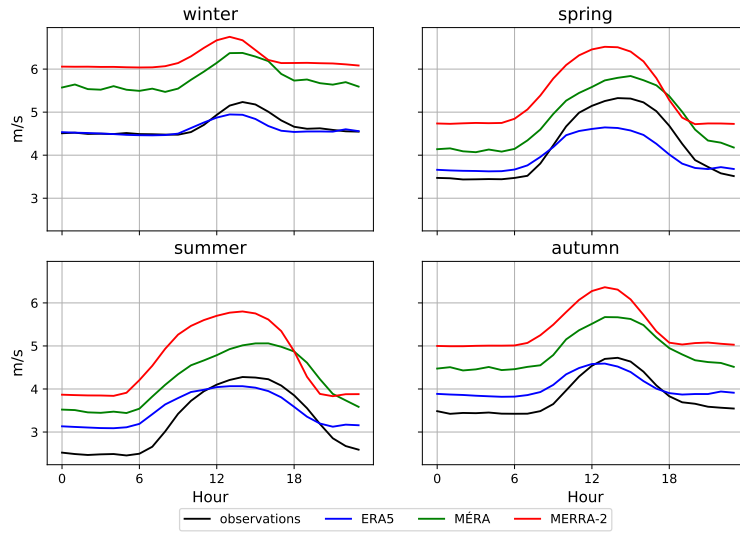

Figure S11: Diurnal mean 10m wind speed at the Clones in winter (DJF), spring (MAM), summer (JJA) and autumn (SON) for ERA5 (blue), MÉRA (green) and MERRA-2 (red). The horizontal dashed lines represent the overall average seasonal ME.

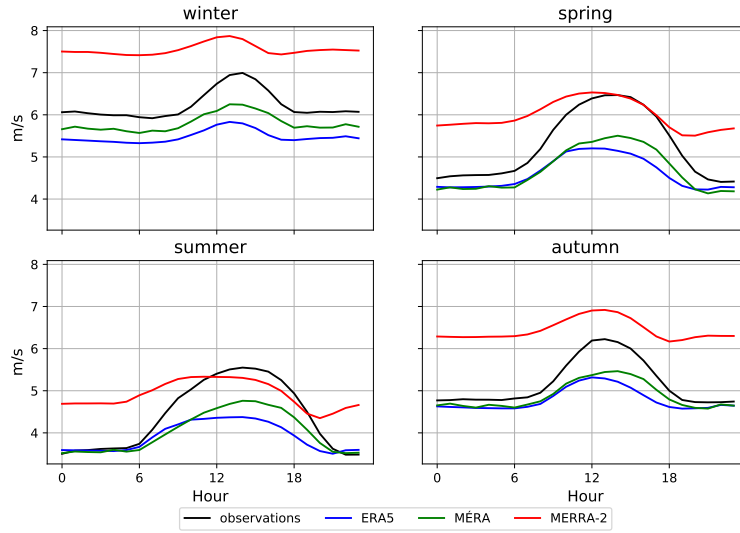

Figure S12: Diurnal mean 10m wind speed at the Dublin Airport in winter (DJF), spring (MAM), summer (JJA) and autumn (SON) for ERA5 (blue), MÉRA (green) and MERRA-2 (red). The horizontal dashed lines represent the overall average seasonal ME.

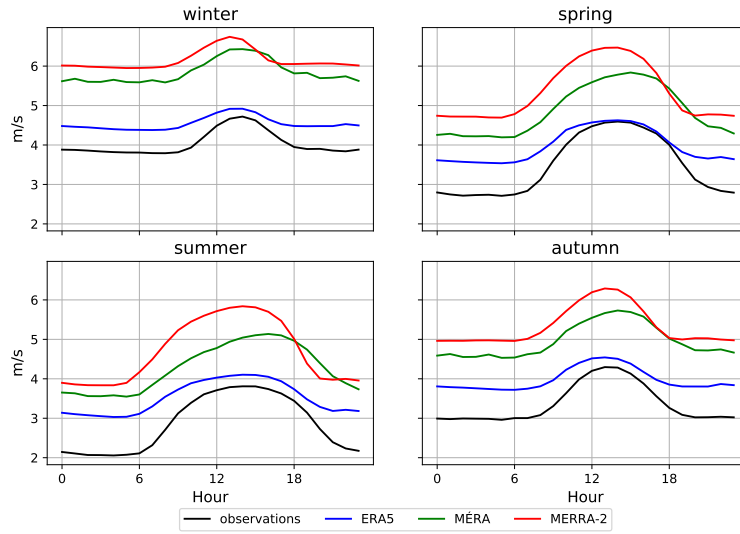

Figure S13: Diurnal mean 10m wind speed at the Birr in winter (DJF), spring (MAM), summer (JJA) and autumn (SON) for ERA5 (blue), MÉRA (green) and MERRA-2 (red). The horizontal dashed lines represent the overall average seasonal ME.

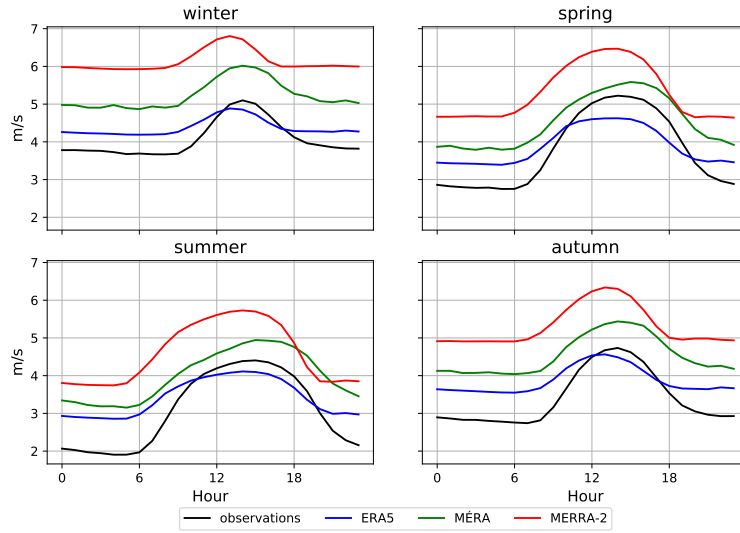

Figure S14: Diurnal mean 10m wind speed at the Kilkenny in winter (DJF), spring (MAM), summer (JJA) and autumn (SON) for ERA5 (blue), MÉRA (green) and MERRA-2 (red). The horizontal dashed lines represent the overall average seasonal ME.

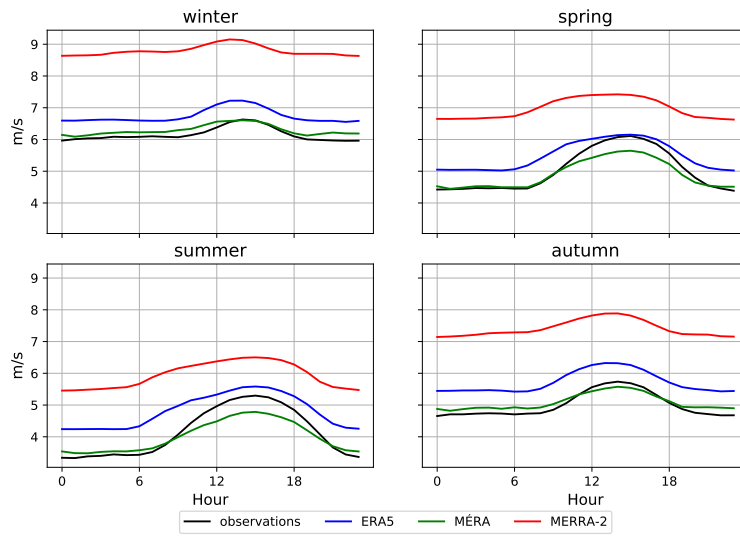

Figure S15: Diurnal mean 10m wind speed at the Valentia Observatory in winter (DJF), spring (MAM), summer (JJA) and autumn (SON) for ERA5 (blue), MÉRA (green) and MERRA-2 (red). The horizontal dashed lines represent the overall average seasonal ME.

### S2.3 Shortwave Radiation

Figures S16 to S20 show the diurnal SW mean error at all stations, similar to Figure 8 in the main text.

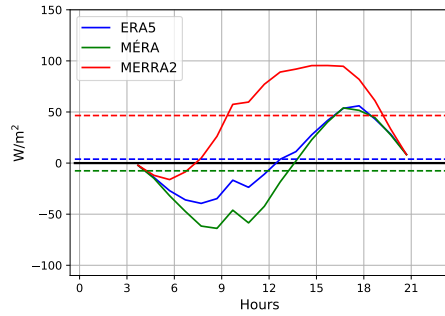

Figure S16: Diurnal mean SW error (ME) in summer (JJA) at Malin Head, for ERA5 (blue), MÉRA (green) and MERRA-2 (red). The horizontal dashed line represents the overall average seasonal ME.

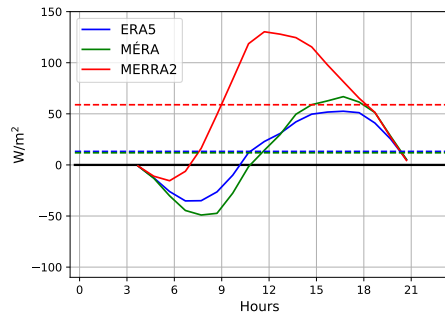

Figure S17: Diurnal mean SW error (ME) in summer (JJA) at Dublin Airport, for ERA5 (blue), MÉRA (green) and MERRA-2 (red). The horizontal dashed line represents the overall average seasonal ME.

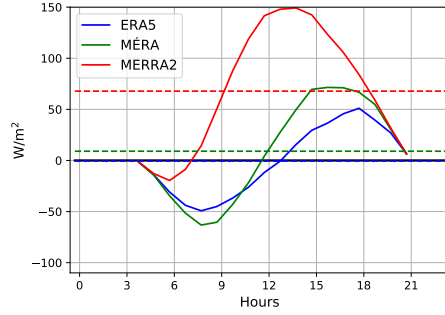

Figure S18: Diurnal mean SW error (ME) in summer (JJA) at Birr, for ERA5 (blue), MÉRA (green) and MERRA-2 (red). The horizontal dashed line represents the overall average seasonal ME.

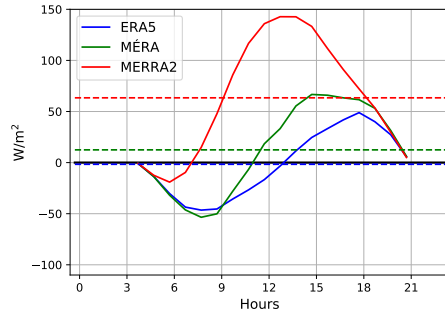

Figure S19: Diurnal mean SW error (ME) in summer (JJA) at Kilkenny, for ERA5 (blue), MÉRA (green) and MERRA-2 (red). The horizontal dashed line represents the overall average seasonal ME.

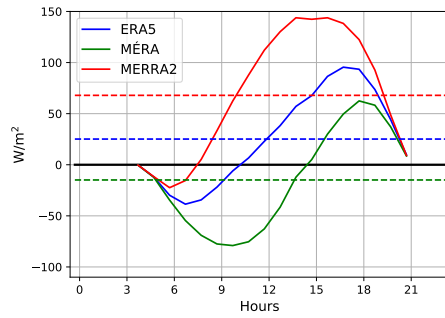

Figure S20: Diurnal mean SW error (ME) in summer (JJA) at Valentia Observatory, for ERA5 (blue), MÉRA (green) and MERRA-2 (red). The horizontal dashed line represents the overall average seasonal ME.
